# Supplementary material
Source: publisher site journal article supplement (https://www.dovepress.com/article/403712)
Supplement: Supplementary file 1 [file get_supplementary_file.php]

# Appendix

**Table S1** HRG codes and tariffs from NHS National Tariff workbook (2021)15

| **Code** | **Description** | **Tariff** |
| --- | --- | --- |
| WF01C_non_f2f | Cardiology (TFC320) Outpatient Appointment - Follow up (Non Face to Face) | £56 |
| WF01A_f2f | Cardiology (TFC320) Outpatient Appointment - Follow up (Face to Face) | £78 |
| WF01C_psy_non_f2f | Clinical Psychology (XXXX) Outpatient Appointment – Follow Up (Non Face to Face) | £306 |
| WF01A_psycho | Clinical Psychology (TFC656) Outpatient Appointment – Follow Up (Face to Face) | £306 |
| EB07B_non_elective | NON ELECTIVE - Arrhythmia or Conduction Disorders with CC Score 10-12 | £3,023 |
| EY31A_elective | ELECTIVE -Standard Percutaneous Transluminal Ablation of Heart with CC Score 3+ | £2,556 |
| EY31A_non_elective | NON ELECTIVE - Standard Percutaneous Transluminal Ablation of Heart with CC Score 3+ | £6,217 |
| EY30A_elective | ELECTIVE - Complex Percutaneous Transluminal Ablation of Heart with CC Score 3+ | £4,603 |
| EY30A_non_elective | NON ELECTIVE - Complex Percutaneous Transluminal Ablation of Heart with CC Score 3+ | £9,293 |
| Trim point | For non-elective >22 days | £273 |

**Table S2** Medications received at time of shock episode

| **Medication** |  | **Total episodes (n=143)** |
| --- | --- | --- |
| Beta blockers (%) | Yes | 132 ( 92.3) |
| No | 10 ( 7.0) |
| Unknown | 1 ( 0.7) |
| Sotalol (%) | Yes | 4 ( 2.8) |
| No | 138 ( 96.5) |
| Unknown | 1 ( 0.7) |
| Statins (%) | Yes | 90 ( 62.9) |
| No | 51 ( 35.7) |
| Unknown | 2 ( 1.4) |
| Diuretic (%) | Yes | 75 ( 52.4) |
| No | 67 ( 46.9) |
| Unknown | 1 ( 0.7) |
| MRA (%) | Yes | 59 ( 41.3) |
| No | 83 ( 58.0) |
| Unknown | 1 ( 0.7) |
| RAAS inhibitors (%) | Yes | 114 ( 79.7) |
| No | 28 ( 19.6) |
| Unknown | 1 ( 0.7) |
| Ca_antagonist (%) | Yes | 9 ( 6.3) |
| No | 133 ( 93.0) |
| Unknown | 1 ( 0.7) |
| Amiodarone (%) | Yes | 23 ( 16.1) |
| No | 119 ( 83.2) |
| Unknown | 1 ( 0.7) |
| DOAC (%) | Yes | 43 ( 54.4) |
| No | 35 ( 44.3) |
| Unknown | 1 ( 1.3) |
| Warfarin (%) | Yes | 37 ( 45.7) |
| No | 43 ( 53.1) |
| Unknown | 1 ( 1.2) |
| Digoxin (%) | Yes | 16 ( 11.2) |
| No | 126 ( 88.1) |
| Unknown | 1 ( 0.7) |

**Abbreviations:** ACE, angiotensin-converting-enzyme inhibitor; DOAC, direct acting oral anticoagulants; MRA, mineralocortoid receptor antagonist; RAAS, renin angiotensin aldosterone system
